# Supplementary material
Source: Research Square preprint supplement (doi:10.21203/rs.3.rs-9843195/v1)
Supplement: Supplementary file 1 [file c9e9de643416a01a5f45fd18.pdf]

**Supplementary information for**

**RUNX3 negatively regulates autophagic degradation of**

**aggregated  $\alpha$ -synuclein**

Ikumi Tomizawa<sup>1</sup>, Yung-Wen Chiu<sup>1</sup>, Yutaka Tatenuma<sup>1</sup>, Norikazu Hara<sup>2</sup>, Mai Hasegawa<sup>2</sup>,  
Masataka Kikuchi<sup>2</sup>, Tatsuo Mano<sup>3,4</sup>, Maiko Ono<sup>5</sup>, Maho Morishima<sup>6</sup>, Shigeo Murayama<sup>6</sup>,  
Yuko Saito<sup>6</sup>, Makoto Higuchi<sup>7,8</sup>, Mari Tada<sup>9</sup>, Akiyoshi Kakita<sup>9</sup>, Tatsushi Toda<sup>3,10</sup>, Atsushi  
Iwata<sup>3,11</sup>, Akinori Miyashita<sup>2</sup>, Takeshi Ikeuchi<sup>2</sup>, Yukiko Hori<sup>1</sup>, Taisuke Tomita<sup>1</sup>

<sup>1</sup> Laboratory of Neuropathology and Neuroscience, Graduate School of Pharmaceutical Sciences, The University of Tokyo, Tokyo, Japan 113-0033

<sup>2</sup> Center for Bioresources, Brain Research Institute, Niigata University, Niigata, Japan 951-8122

<sup>3</sup> Department of Neurology, The University of Tokyo Hospital, Tokyo, Japan 113-8655

<sup>4</sup> Department of Degenerative Neurological Diseases, National Institute of Neuroscience, National Center of Neurology and Psychiatry, Tokyo Japan 187-8551

<sup>5</sup> Institute for Quantum Life Science, National Institutes for Quantum Science and

Technology, Chiba, Japan 263-0024

<sup>6</sup> Department of Neuropathology (Brain Bank for Aging Research), Tokyo Metropolitan Institute for Geriatrics and Gerontology, Tokyo, Tokyo, Japan 173-0015

<sup>7</sup> Advanced Neuroimaging Center, Institute for Quantum Medical Science, National Institutes for Quantum Science and Technology, Chiba, Japan 263-0024

<sup>8</sup> Department of Neuroetiology and Diagnostic Science, Graduate School of Medicine, Osaka Metropolitan University, Osaka, Japan 545-8585

<sup>9</sup> Department of Pathology, Brain Research Institute, Niigata University, Niigata, Japan 951-8122

<sup>10</sup> National Center Hospital, National Center of Neurology and Psychiatry, Tokyo Japan 187-8551

<sup>11</sup> Department of Neurology, Tokyo Metropolitan Institute for Geriatrics and Gerontology, Tokyo, Japan 173-0015

\*Correspondence: Y.H., [yukiko-hori@mol.f.u-tokyo.ac.jp](mailto:yukiko-hori@mol.f.u-tokyo.ac.jp)

\*Correspondence: T.T., [taisuke@mol.f.u-tokyo.ac.jp](mailto:taisuke@mol.f.u-tokyo.ac.jp)

## Supplementary table 1

*Summary of patient derived samples used for the single nucleus RNA sequencing*

| <b>ID</b>     | <b>Clinical diagnosis</b> | <b>Age at death</b> | <b>Sex</b> | <b>Brain Region</b> | <b>Provided from</b>                                                  |
|---------------|---------------------------|---------------------|------------|---------------------|-----------------------------------------------------------------------|
| Control_AMG_1 | Control                   | 66                  | M          | Amygdala            | Department of Pathology, Brain Research Institute, Niigata University |
| Control_AMG_2 | Control                   | 67                  | F          | Amygdala            | Department of Pathology, Brain Research Institute, Niigata University |
| Control_AMG_3 | Control                   | 74                  | M          | Amygdala            | Department of Pathology, Brain Research Institute, Niigata University |
| MSA_AMG_1     | MSA                       | 64                  | M          | Amygdala            | Department of Pathology, Brain Research Institute, Niigata University |
| MSA_AMG_2     | MSA                       | 74                  | F          | Amygdala            | Department of Pathology, Brain Research Institute, Niigata University |
| MSA_AMG_3     | MSA                       | 78                  | M          | Amygdala            | Department of Pathology, Brain Research Institute, Niigata University |

Supplementary figure 1

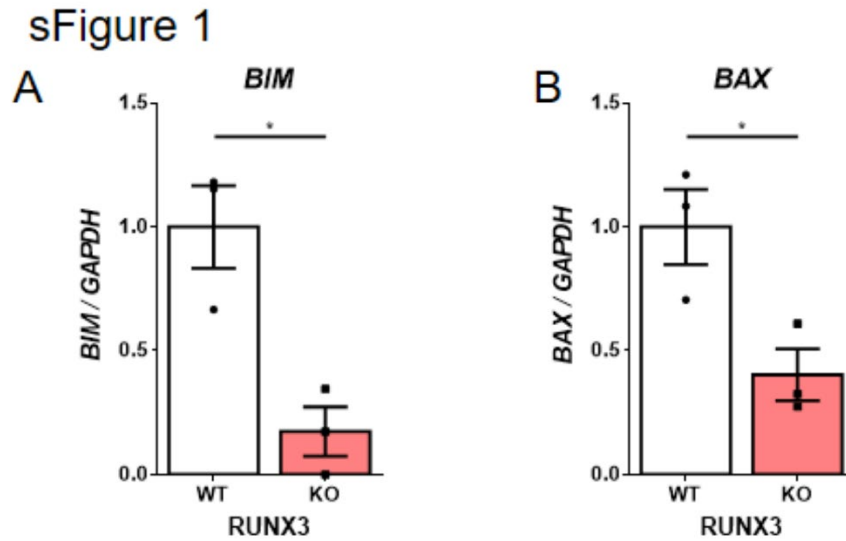

sFig. 1. Expression of *RUNX3* downstream factors in *RUNX3* KO cells.

(A) qRT-PCR analysis of *BIM* mRNA levels in *RUNX3* KO cells normalized by *GAPDH*

(n=3, mean ± SEM, Student's t-test, \*: p<0.05).

(B) qRT-PCR analysis of *BAX* mRNA levels in *RUNX3* KO cells normalized by *GAPDH*

(n=3, mean ± SEM, Student's t-test, \*: p<0.05).
